# Supplementary material for: Synergistic theoretical and electrochemical evaluation of sulfonamide-based inhibitors for mild steel corrosion in HCl
Source: Royal Society of Chemistry journal article supplement (doi:10.1039/d6ra02832b), 2026-06-05
Supplement: d6ra02832b1.pdf [file d6ra02832b1.pdf]

### Supplementary Material

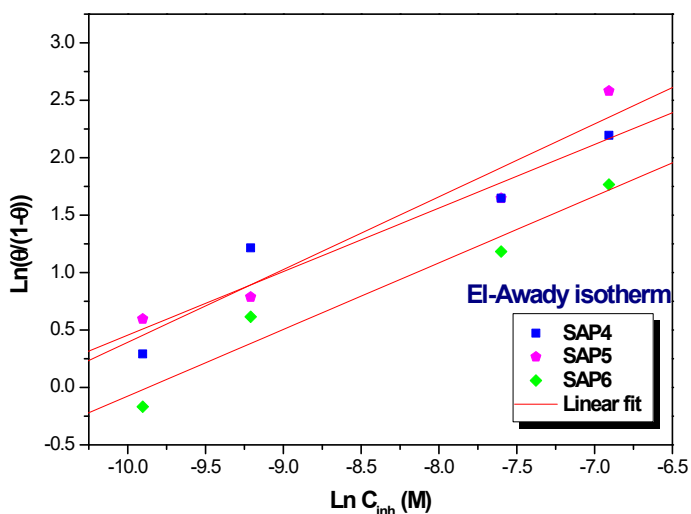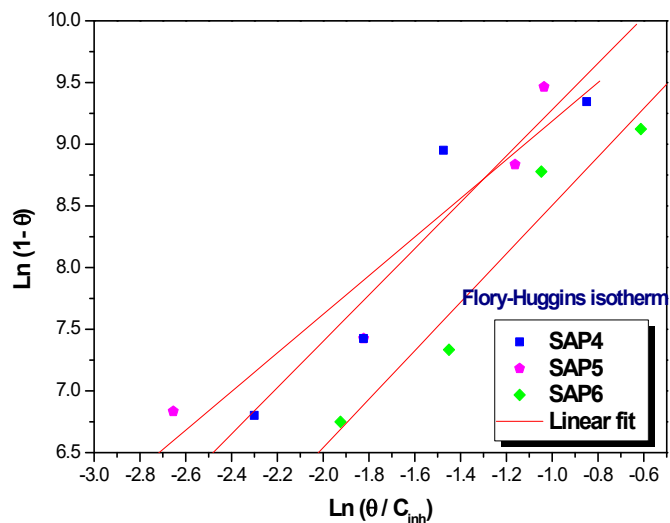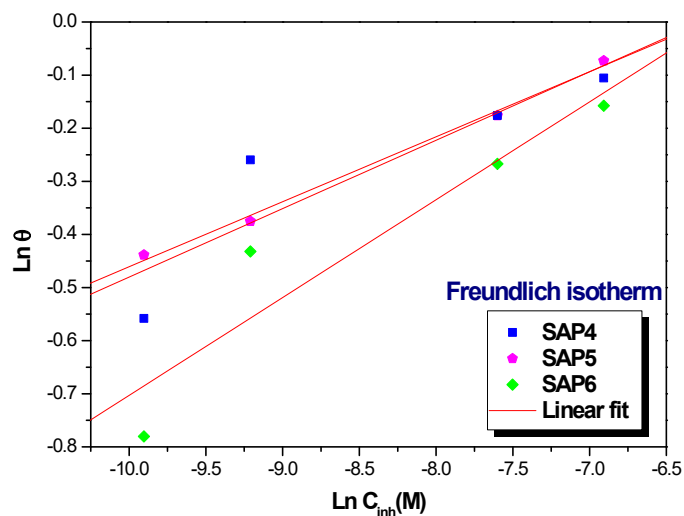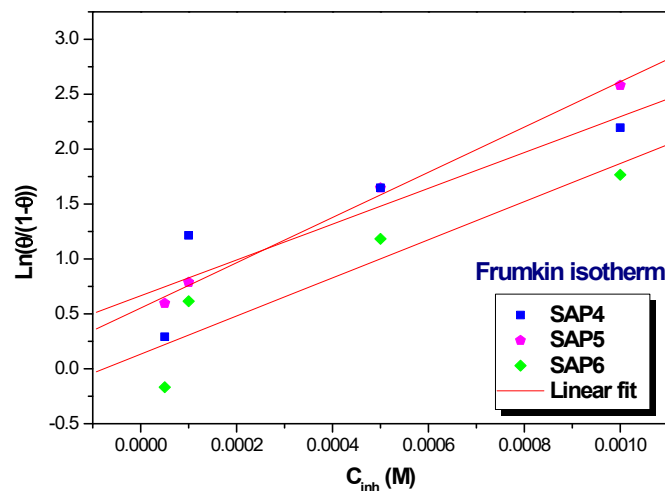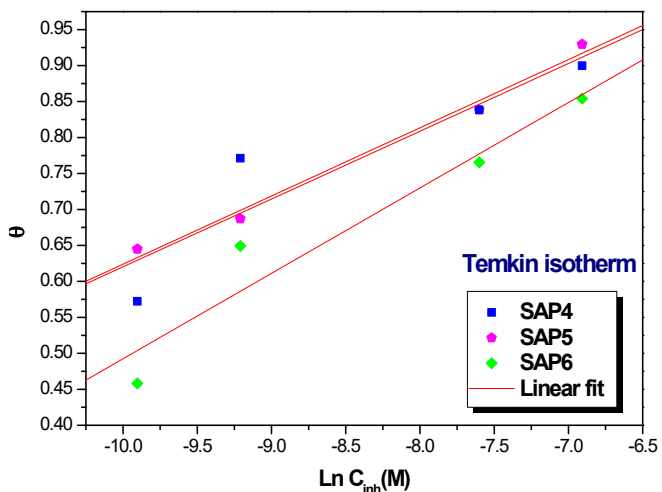

**Fig. S1.** Adsorption isotherm plots of corrosion inhibitors (SAP4, SAP5 and SAP6)

**Table S1:** Adsorption parameters determined for corrosion inhibitors (SAP4, SAP5 and SAP6) using different adsorption isotherm

| <i>Inhibitor</i> | <i>Isotherm</i> | <i>Parameter</i> |           | $R^2$  | $K$         | $\Delta G^{\circ}_{ads}$ (kJ/mol) |
|------------------|-----------------|------------------|-----------|--------|-------------|-----------------------------------|
| <i>SAP4</i>      | Langmuir        | Slope            | 1.1026    | 0.9993 | 47472.11    | -36.66                            |
|                  | Temkin          | $A$              | -5.3067   | 0.9200 | 15913507.53 | -51.07                            |
|                  | Frumkin         | $D$              | -815.0950 | 0.8924 | 0.51        | -83.10                            |
|                  | Freundlich      | $Z$              | 7.7592    | 0.8988 | 2.24        | -11.96                            |
|                  | Flory-Huggins   | $X$              | 1.8782    | 0.9464 | 70183.60    | -37.62                            |
|                  | El-Awady        | $I/y$            | 1.8070    | 0.9550 | 50124.36    | -36.79                            |
| <i>SAP5</i>      | Langmuir        | Slope            | 1.0719    | 0.9986 | 38217.97    | -36.12                            |
|                  | Temkin          | $A$              | -5.2737   | 0.9943 | 15882690.53 | -51.07                            |
|                  | Frumkin         | $D$              | 867.8273  | 0.9265 | 1.14        | -10.29                            |

|             |               |       |          |        |            |        |
|-------------|---------------|-------|----------|--------|------------|--------|
|             | Freundlich    | $Z$   | 8.1686   | 0.9977 | 2.15       | -11.85 |
|             | Flory-Huggins | $X$   | 1.5657   | 0.9539 | 46757.03   | -36.62 |
|             | El-Awady      | $I/y$ | 1.5778   | 0.9682 | 837.57     | -26.65 |
| <b>SAP6</b> | Langmuir      | Slope | 1.1554   | 0.9982 | 27649.36   | -35.32 |
|             | Temkin        | $A$   | -4.2109  | 0.9639 | 1393220.01 | -45.03 |
|             | Frumkin       | $D$   | 867.8273 | 0.9265 | 1.14       | -10.29 |
|             | Freundlich    | $Z$   | 5.4274   | 0.9409 | 3.12       | -12.78 |
|             | Flory-Huggins | $X$   | 1.9641   | 0.9685 | 35198.19   | -35.91 |
|             | El-Awady      | $I/y$ | 1.7238   | 0.9762 | 306.66     | -24.15 |
